# Supplementary material
Source: publisher figshare collection journal article supplement (https://springernature.figshare.com/ndownloader/files/10109934)
Supplement: Supplementary file [file 10109934]

## Additional file 2

**Protocols used for Amplifluor and KASP markers and basic PCR cyclers.** Protocols 1 and 2 were designed for Amplifluor SNP analysis, while Protocol 3 was used for KASP markers. Protocol 4 was designed as optimal and used in the current study.

| Steps                       | 1<br>[10-11,19-20] |            |           | 2<br>[14-15]   |               |           | 3<br>[25-31]                            |              |           | 4<br>Current study |           |           |
|-----------------------------|--------------------|------------|-----------|----------------|---------------|-----------|-----------------------------------------|--------------|-----------|--------------------|-----------|-----------|
|                             | Temp<br>. (°C)     | Time       | Cyc<br>le | Temp<br>. (°C) | Time<br>(sec) | Cyc<br>le | Temp.<br>(°C)                           | Time         | Cyc<br>le | Temp<br>. (°C)     | Time      | Cyc<br>le |
| Initial<br>denaturatio<br>n | 95                 | 3-4<br>min | 1         | 96             | 4-10<br>min   | 1         | 94-95                                   | 10-15<br>min | 1         | 95                 | 5 min     | 1         |
| Denaturati<br>on            | 95                 | 10<br>sec  | 35-<br>45 | 95             | 10-15<br>sec  | 20        | 94-95                                   | 20<br>sec    | 10        | 95                 | 10<br>sec | 25-<br>30 |
| Annealing                   | 55-60              | 20<br>sec  |           | 55-64          | 5-10<br>sec   |           | 61-65,<br>drop 0.6-<br>1°C per<br>cycle | 25-60<br>sec |           | 56-60              | 10<br>sec |           |
| Extension                   | 72                 | 40<br>sec  |           | 72             | 10-15<br>sec  |           |                                         |              |           | 72                 | 20<br>sec |           |
| Denaturati<br>on            | -                  | -          | -         | 96             | 10<br>sec     | 20-<br>25 | 94                                      | 10-20<br>sec | 25-<br>35 | 95                 | 10<br>sec |           |
| Annealing                   |                    |            |           | 50-56          | 20-30<br>sec  |           | 55-60                                   | 60<br>sec    |           | 51-55              | 20<br>sec |           |
| Extension                   |                    |            |           | 72             | 40<br>sec     |           | -                                       | -            |           | 72                 | 40<br>sec |           |
